# Supplementary material for: Eu2+-Doped NaBa4(AlB4O9)2X3 (X = Cl, Br) phosphors with intense two-center blue emission and high color purity for n-UV pumped white light-emitting diodes
Source: Royal Society of Chemistry journal article supplement (doi:10.1039/c6tc02445a), 2016-01-01
Supplement: c6tc02445a1.pdf [file c6tc02445a1.pdf]

# Electronic Supplementary Information

**Eu<sup>2+</sup> doped NaBa<sub>4</sub>(AlB<sub>4</sub>O<sub>9</sub>)<sub>2</sub>X<sub>3</sub> (X = Cl, Br) phosphors with intense two-center blue-emission and high color purity for n-UV pumped white-light-emitting diodes**

Zhipeng Lian and Qingfeng Yan\*

*Department of Chemistry, Tsinghua University, Beijing 100084, China*

*Tel: +86-10-62792830; E-mail: [yanqf@mail.tsinghua.edu.cn](mailto:yanqf@mail.tsinghua.edu.cn)*

**Table S1.** A comparison of some recently reported blue-emitting phosphors with high color purity.

| Materials                                                                          | Synthesis Temp. (°C) | Color coordinate | Excitation band (nm) | PL FWHM (nm) | Efficiency or Intensity                                       | Color purity |
|------------------------------------------------------------------------------------|----------------------|------------------|----------------------|--------------|---------------------------------------------------------------|--------------|
| SrB <sub>2</sub> O <sub>4</sub> :Eu <sup>2+</sup> [1]                              | 800                  | (0.1480, 0.0400) | 270-350              | ~ 45         | Not reported                                                  | 97.0%        |
| NaSrBO <sub>3</sub> :Ce <sup>3+</sup> [2]                                          | 850                  | (0.1583, 0.0493) | 325-390              | ~ 67         | External QE 89% of that for BAM:Eu <sup>2+</sup>              | Not indexed  |
| K <sub>2</sub> Al <sub>2</sub> B <sub>2</sub> O <sub>7</sub> :Eu <sup>2+</sup> [3] | 1000                 | (0.147, 0.051)   | 230-420              | ~ 50         | Integrated PL intensity ~58% of that for BAM:Eu <sup>2+</sup> | Not indexed  |
| Sr <sub>5</sub> (PO <sub>4</sub> ) <sub>3</sub> Cl:Eu <sup>2+</sup> [4]            | 1050                 | (0.1540, 0.0230) | 240-420              | ~ 32         | Internal QE 90% of that for BAM:Eu <sup>2+</sup>              | 99.0%        |
| NBAC: Eu <sup>2+</sup> (this work)                                                 | 850                  | (0.1578, 0.0248) | 240-420              | 37           | Integrated PL intensity 114% of that for BAM:Eu <sup>2+</sup> | 98.65%       |
| NBAB: Eu <sup>2+</sup> (this work)                                                 | 850                  | (0.1584, 0.0196) | 250-420              | 33           | Integrated PL intensity 129% of that for BAM:Eu <sup>2+</sup> | 99.58%       |

**Table S2.** The refined positions of all atoms for NBAC: 0.1Eu<sup>2+</sup> (a) and NBAB: 0.1Eu<sup>2+</sup> (b) phosphors.

| Sample |              | NaBa <sub>3.9</sub> Eu <sub>0.1</sub> (AlB <sub>4</sub> O <sub>9</sub> ) <sub>2</sub> Cl <sub>3</sub> |       |        |           |       |
|--------|--------------|-------------------------------------------------------------------------------------------------------|-------|--------|-----------|-------|
| Atom   | Wyckoff site | x                                                                                                     | y     | z      | Occupancy | Uiso  |
| Na(1)  | 8d           | 0.000                                                                                                 | 0.000 | -0.128 | 0.980     | 0.079 |
| Eu(1)  | 8d           | 0.000                                                                                                 | 0.000 | -0.128 | 0.020     | 0.079 |
| Ba     | 8d           | 0.983                                                                                                 | 0.727 | 0.224  | 0.975     | 0.023 |
| Eu(2)  | 2a           | 0.983                                                                                                 | 0.727 | 0.224  | 0.020     | 0.023 |
| Na(2)  | 2a           | 0.983                                                                                                 | 0.727 | 0.224  | 0.005     | 0.023 |
| Al     | 4c           | 0.297                                                                                                 | 0.703 | 0.218  | 1.000     | 0.017 |
| B(1)   | 4c           | 0.234                                                                                                 | 0.767 | 0.583  | 1.000     | 0.017 |
| B(2)   | 4c           | 0.185                                                                                                 | 0.815 | -0.08  | 1.000     | 0.010 |
| B(3)   | 8d           | 0.533                                                                                                 | 0.733 | 0.181  | 1.000     | 0.013 |
| O(1)   | 8d           | 0.116                                                                                                 | 0.743 | 0.545  | 1.000     | 0.024 |
| O(2)   | 8d           | 0.063                                                                                                 | 0.798 | 0.869  | 1.000     | 0.018 |
| O(3)   | 4c           | 0.303                                                                                                 | 0.697 | 0.471  | 1.000     | 0.011 |
| O(4)   | 4c           | 0.200                                                                                                 | 0.800 | 0.124  | 1.000     | 0.015 |
| O(5)   | 4c           | 0.255                                                                                                 | 0.745 | -0.204 | 1.000     | 0.014 |
| O(6)   | 8d           | 0.428                                                                                                 | 0.740 | 0.125  | 1.000     | 0.028 |
| Cl(1)  | 2a           | 0.000                                                                                                 | 0.000 | 0.282  | 1.000     | 0.012 |
| Cl(2)  | 4b           | 0.000                                                                                                 | 0.500 | 0.440  | 1.000     | 0.084 |
| Sample |              | NaBa <sub>3.9</sub> Eu <sub>0.1</sub> (AlB <sub>4</sub> O <sub>9</sub> ) <sub>2</sub> Br <sub>3</sub> |       |        |           |       |
| Atom   | Wyckoff site | x                                                                                                     | y     | z      | Occupancy | Uiso  |
| Na(1)  | 2a           | 0.500                                                                                                 | 0.500 | 0.865  | 0.980     | 0.174 |
| Eu(1)  | 2a           | 0.500                                                                                                 | 0.500 | 0.865  | 0.020     | 0.174 |
| Ba     | 8d           | 0.517                                                                                                 | 0.766 | 0.487  | 0.975     | 0.027 |
| Eu(2)  | 8d           | 0.517                                                                                                 | 0.766 | 0.487  | 0.020     | 0.027 |
| Na(2)  | 8d           | 0.517                                                                                                 | 0.766 | 0.487  | 0.005     | 0.023 |
| Al     | 4c           | 0.197                                                                                                 | 0.803 | 0.471  | 1.000     | 0.016 |
| B(1)   | 8d           | 0.465                                                                                                 | 0.734 | 1.029  | 1.000     | 0.013 |
| B(2)   | 4c           | 0.314                                                                                                 | 0.686 | 0.791  | 1.000     | 0.008 |
| B(3)   | 4c           | 0.268                                                                                                 | 0.732 | 0.134  | 1.000     | 0.007 |
| O(1)   | 4c           | 0.198                                                                                                 | 0.802 | 0.243  | 1.000     | 0.007 |
| O(2)   | 8d           | 0.072                                                                                                 | 0.764 | 0.587  | 1.000     | 0.014 |
| O(3)   | 4c           | 0.297                                                                                                 | 0.703 | 0.588  | 1.000     | 0.010 |
| O(4)   | 8d           | 0.435                                                                                                 | 0.705 | 0.841  | 1.000     | 0.012 |
| O(5)   | 4c           | 0.246                                                                                                 | 0.754 | 0.915  | 1.000     | 0.004 |
| O(6)   | 8d           | 0.386                                                                                                 | 0.756 | 0.166  | 1.000     | 0.015 |
| Br(1)  | 2a           | 0.500                                                                                                 | 0.500 | 0.406  | 1.000     | 0.045 |
| Br(2)  | 4b           | 0.500                                                                                                 | 1.000 | 0.273  | 1.000     | 0.139 |

#### Reference

1. J. Zheng, L. Ying, Q. Cheng, Z. Guo, L. Cai, Y. Lu, C. Chen, *Mater. Res. Bull.*, 2015, **64**, 51.
2. W.-R. Liu, C.-H. Huang, C.-P. Wu, Y.-C. Chiu, Y.-T. Yeh, T.-M. Chen, *J. Mater. Chem.*, 2011, **21**, 6869.
3. W. Xiao, X. Zhang, Z. Hao, G.-H. Pan, Y. Luo, L. Zhang, J. Zhang, *Inorg. Chem.*, 2015, **54**, 3189
4. J. Zheng, Q. Cheng, S. Wu, Z. Guo, Y. Zhuang, Y. Lu, Y. Li, C. Chen, *J. Mater. Chem. C*, 2015, **3**, 11219.
